# Supplementary material for: Activation of CD4 and CD8 T cell receptors and regulatory T cells in response to human proteins
Source: PeerJ. 2018 Mar 9;6:e4462. doi: 10.7717/peerj.4462 (PMC5846456; doi:10.7717/peerj.4462)
Supplement: Data S1 [file peerj-06-4462-s001.xlsx]

## Sheet: Tabelle1
A)
		Albumin	b-Aktin	GAP-DH	Insulin			Albumin	b-Aktin	GAP-DH	Insulin
		-4.5	8.5	9.7	-3.5			1	7.9	8.7	1.3
		-4	9.5	10.5	-4.2			1.5	8.8	11.2	1.2
		-3	7.4	11.4	-5.2			1.2	6.9	7.6	1.5
		-5.7	9.8	8.4	-2.5			0.5	9.6	7.9	0.8
		-3.8	7.2	8.2	-3.2			0.8	6.4	7.2	0.3
		-6	6.1	8.1	-2.2			0.1	5.8	7.5	0.2
		-4.2	9.7	11.4	-3.8			1.2	9.5	11.2	1.3
	Mean	-4.45714	8.31429	9.67143	-3.51429		Mean	0.9	7.84286	8.75714	0.942857
	Std	1.06122	1.44618	1.4671	1.0205		Std	0.476095	1.5219	1.73288	0.519157
A2)
		Albumin	b-Aktin	GAP-DH	Insulin			Albumin	b-Aktin	GAP-DH	Insulin
		-4.8	9.2	10.2	-4.1			5	8.5	9.5	4.5
		-4.5	9.4	10.8	-4.9			4.5	9.2	9.7	5
		-3.5	7.9	12.5	-6.1			3.5	8.3	11.6	6.5
		-5.9	10.2	8.4	-3.5			6	11.2	7.6	3.5
		-4.5	7.1	8.1	-5.1			4.2	6.5	7.2	5
		-6.2	6.5	9.2	-3.2			6	6.8	8.6	3.5
		-5.1	10.2	12.5	-4.5			5.5	11.2	12.4	4
	Mean	-4.92857	8.64286	10.2429	-4.48571		Mean	4.95714	8.81429	9.51429	4.57143
	Std	0.914174	1.48645	1.80634	0.99403		Std	0.946673	1.88452	1.93944	1.05785
B)
		Albumin	b-Aktin	GAP-DH	Insulin			Albumin	b-Aktin	GAP-DH	Insulin
		0.25	0.87	0.98	0.35			0.22	0.85	0.99	0.25
		0.35	0.97	0.99	0.42			0.32	0.89	1.06	0.42
		0.45	0.77	1.05	0.23			0.41	0.95	1.15	0.36
		0.35	0.65	0.76	0.45			0.38	0.54	0.68	0.51
		0.15	0.87	1.11	0.45			0.12	0.84	1.05	0.42
		0.12	0.97	0.78	0.52			0.15	0.93	0.89	0.65
		0.11	1.01	1.12	0.25			0.15	1.05	1.21	0.15
		0.21	0.85	1.05	0.15			0.21	0.75	1.01	0.25
	Mean	0.24875	0.87	0.98	0.3525		Mean	0.245	0.85	1.005	0.37625
	Std	0.124262	0.118563	0.13877	0.129918		Std	0.111227	0.153157	0.163532	0.160351
B2)
		Albumin	b-Aktin	GAP-DH	Insulin			Albumin	b-Aktin	GAP-DH	Insulin
		0.75	0.84	0.84	0.74			0.84	0.85	0.84	0.68
		0.89	0.95	0.84	0.57			0.95	0.95	0.68	0.72
		0.75	0.78	1.2	0.89			0.75	0.74	0.75	0.86
		0.74	0.75	0.85	0.85			0.95	0.68	0.84	0.95
		0.74	0.89	1.12	0.74			0.65	0.79	0.95	0.74
		0.84	0.95	0.75	0.75			0.74	0.85	0.57	0.76
		0.94	1.21	1.2	0.94			0.85	0.96	0.75	0.68
		0.75	0.95	1.05	0.75			0.93	0.84	0.86	0.86
	Mean	0.8	0.915	0.98125	0.77875		Mean	0.8325	0.8325	0.78	0.78125
	Std	0.0792825	0.142628	0.181379	0.114447		Std	0.110938	0.0958794	0.118563	0.0980434
C)
		Albumin	b-Aktin	GAP-DH	Insulin			Albumin	b-Aktin	GAP-DH	Insulin
		8.5	2.5	4.5	9.8			7.5	3.5	5.2	10.2
		9.5	3.5	5.6	10.58			9.4	2.7	6.5	12.4
		6.5	1.68	2.3	7.5			6.2	1.78	3.2	6.8
		8.8	2.48	4.6	12.3			8.7	1.59	5.4	11.5
		5.7	3.65	7.2	4.5			4.2	3.57	6.8	3.5
		8.2	2.1	1.89	13.2			7.5	1.8	2.02	12.5
		11.2	1.86	4.6	6.8			12.5	1.75	2.4	5.7
		8.2	1.95	4.7	12.6			7.2	1.87	4.5	11.2
		10.2	2.45	4.9	10.5			10.5	2.24	5.2	10.8
	Mean	8.53333	2.46333	4.47667	9.75333		Mean	8.18889	2.31111	4.58	9.4
	Std	1.82361	0.742225	1.70573	3.14203		Std	2.58885	0.669451	1.80635	3.45171
