# Supplementary material for: Activation of CD4 and CD8 T cell receptors and regulatory T cells in response to human proteins
Source: PeerJ. 2018 Mar 9;6:e4462. doi: 10.7717/peerj.4462 (PMC5846456; doi:10.7717/peerj.4462)
Supplement: Data S2 — Samples incubated without anything (negative controls, background controls) and samples incubated with Concanavalin A (positive controls). [file peerj-06-4462-s002.xlsx]

## Sheet: Tabelle1
Controls Concanavalin A stimulated samples and negative background controls
CD69+ activation marker
sample number	background control	background control	ConA stimulated	ConA stimulated
	%(CD69+ and CD4+)	%(CD69+ and CD8+)	%(CD69+ and CD4+)	%(CD69+ and CD4+)
1	4	4	15	17
2	5	4.3	16	18
3	4.5	4.5	15	17
4	4.5	4.1	15.3	17.4
5	4.3	4	16.5	17.1
6	4	4.5	16.1	17.8
7	4.2	5.1	15	18.2
8	5	5	15.1	18.5
9	5.1	5.1	16.4	19
mean	4.51111	4.51111	15.6	17.7778
std	0.431406	0.45674	0.640312	0.712
HLADR activation marker
sample number	background control	background control	ConA stimulated	ConA stimulated
	%(CD69+ and CD4+)	%(CD69+ and CD8+)	%(CD69+ and CD4+)	%(CD69+ and CD4+)
1	2	1.7	10	11
2	2.5	2	11	12
3	2.8	1.5	11.5	15
4	3	1.4	10.5	10.2
5	1.5	1.3	10.6	11.3
6	2.8	1.2	9.5	14.5
7	1.7	1.5	9.3	13.5
8	1.5	2.2	10.5	12.5
9	1.8	2.3	12	11.8
mean	2.17778	1.67778	10.5444	12.4222
std	0.599537	0.399305	0.879078	1.61692
